# Supplementary material
Source: publisher figshare collection journal article supplement (https://tandf.figshare.com/articles/dataset/_/9895976)
Supplement: Supplementary file 1 [file 1]

Archive with 4 entries (4 files):
- ienz_a_1667342_sm9962.mpg
- ienz_a_1667342_sm9955.mpg
- ienz_a_1667342_sm9952.mpg
- ienz_a_1667342_sm9945.pdf
